# Supplementary material
Source: PubMed Central journal article supplement (PMC2564605)
Supplement: NIHMS70463-supplement-01.pdf [file NIHMS70463-supplement-01.pdf]

## Supplementary Material

**Supplementary Table 1.** Mass spectrometry results for the His-tagged Tf-TfR complex absorbed to a 20% Ni-NTA monolayer or to a 20% CC Affinity Grid.

| Preparation Method | Component  | I <sup>a</sup> | II <sup>b</sup> |
|--------------------|------------|----------------|-----------------|
| Monolayer          | Human Tf   | 28.2           | 30              |
|                    | Human TfR1 | 50.2           | 52              |
| Affinity Grid      | Human Tf   | 28.9           | 31              |
|                    | Human TfR1 | 51.4           | 50              |

<sup>a</sup> Percentage of sequence coverage for each protein identified

<sup>b</sup> Number of unique tryptic peptides for each protein identified

**Supplementary Table 2.** Mass spectrometry results for the ribosomal complexes with adsorbed to a 20% CC Affinity Grid.

| Component   | I <sup>a</sup> | II <sup>b</sup> |
|-------------|----------------|-----------------|
| Rpl1*       | 38.7           | 6               |
| Rpl2*       | 23.6           | 7               |
| Rpl3-human* | 18.4           | 9               |
| Rpl4*       | 24.6           | 4               |
| Rpl5*       | 32.2           | 8               |
| Rpl6*       | 17.6           | 6               |
| Rpl7*       | 8.4            | 1               |
| Rpl8*       | 12.7           | 2               |
| Rpl9*       | 38.8           | 4               |
| Rpl10*      | 12.7           | 2               |
| Rpl11*      | 13.4           | 2               |
| Rpl12*      | 6.0            | 1               |
| Rpl13*      | 8.3            | 1               |
| Rpl14*      | 16.2           | 2               |
| Rpl15*      | 17.4           | 2               |
| Rpl16*      | 10.7           | 1               |
| Rpl17*      | 16.6           | 3               |
| Rpl18*      | 21.6           | 4               |
| Rpl19*      | 9.9            | 1               |

|        |      |    |
|--------|------|----|
| Rpl20* | 15.6 | 2  |
| Rpl21* | 24.3 | 3  |
| Rpl22* | 64.8 | 12 |
| Rpl23* | 17.5 | 3  |
| Rpl24* | 58.6 | 6  |
| Rpl25* | 20.3 | 4  |
| Rpl26* | 11.2 | 2  |
| Rpl27* | 15.7 | 4  |
| Rpl28* | 17.3 | 3  |
| Rpl29* | 14.4 | 3  |
| Rpl30* | 17.7 | 2  |
| Rps1*  | 9.6  | 3  |
| Rps2*  | 3.3  | 2  |
| Rps3*  | 14.1 | 3  |
| Rps4*  | 46.2 | 10 |
| Rps5*  | 12.6 | 4  |
| Rps6*  | 7.7  | 3  |
| Rps7*  | 4.2  | 1  |
| Rps8*  | 3.7  | 1  |
| Rps9*  | 12.4 | 2  |
| Rps10* | 5.2  | 1  |
| Rps11* | 27.8 | 4  |

|                   |      |   |
|-------------------|------|---|
| Rps12*            | 15.6 | 2 |
| Rps13*            | 63.4 | 8 |
| Rps14*            | 8.4  | 1 |
| Rps15*            | 6.1  | 1 |
| Rps16*            | 7.6  | 1 |
| Rps17*            | 4.4  | 1 |
| Rps18*            | 7.9  | 1 |
| Rps19*            | 4.8  | 1 |
| Rps20*            | 14.9 | 2 |
| EfTu <sup>1</sup> | 17.8 | 6 |

<sup>a</sup> Percentage of sequence coverage for each protein identified

<sup>b</sup> Number of unique tryptic peptides for each protein identified

\*Ribosomal proteins

<sup>1</sup>Ribosome associated proteins

(Rpl = ribosomal protein large subunit; Rps = ribosomal protein small subunit; Eftu = elongation factor tu)

**Supplementary Table 3.** Mass spectrometry results for the His-tagged AQP9 complex absorbed to a Ni-NTA agarose column or to a 20% CC Affinity Grid.

| Preparation Method | Component | I <sup>a</sup> | II <sup>b</sup> |
|--------------------|-----------|----------------|-----------------|
| Ni-NTA column      | Rat AQP9  | 10.3           | 5               |
| Affinity Grid      | Rat AQP9  | 25.2           | 8               |

<sup>a</sup> Percentage of sequence coverage for each protein identified

<sup>b</sup> Number of unique tryptic peptides for each protein identified

Supplementary Figure 1. Kelly - 2008

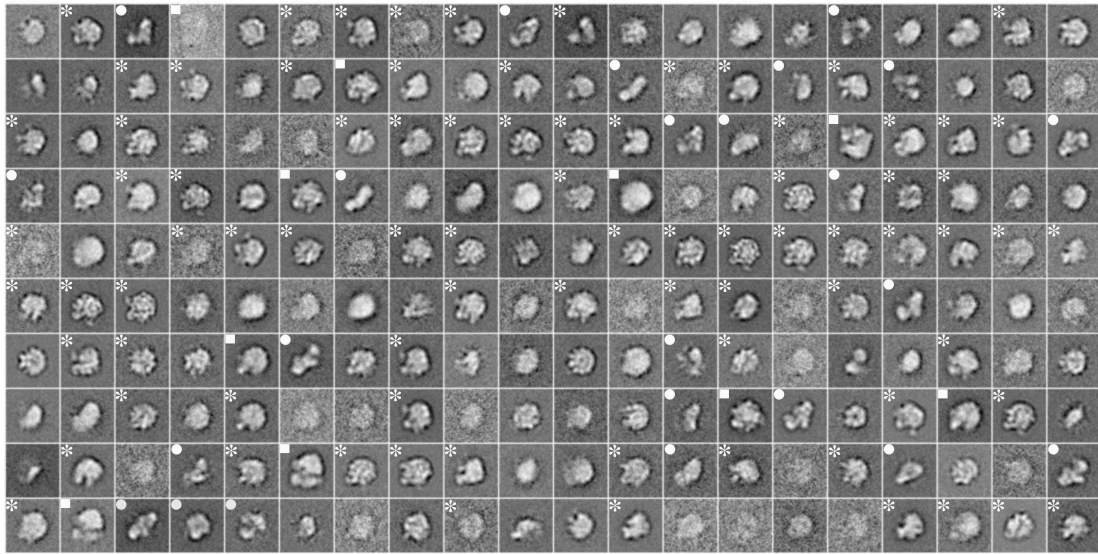

**Supplementary Figure 1. Class averages of vitrified complexes containing His-tagged rpl3 on 20% HC Affinity Grids.** The 200 class averages obtained from classification of 52,507 particle images of vitrified rpl3-complexes. The side length of the individual panels is 38 nm. Class averages corresponding to projections of the 50S ribosomal subunit are marked by an asterisk, those corresponding to projections of the 70S ribosome by a square, and those corresponding to projections of the 30S ribosomal subunit by a circle.
